# Supplementary material for: Anchoring tungsten oxide nanorods on TiO2 nanowires coupled with carbon for efficient lithium-ion storage
Source: Royal Society of Chemistry journal article supplement (doi:10.1039/d3dt03102k), 2023-01-01
Supplement: d3dt03102k1.pdf [file d3dt03102k1.pdf]

*Supporting information*

**Anchoring Tungsten oxide nanorods on TiO<sub>2</sub> Nanowires  
Coupled with Carbon for Efficient Lithium-Ion Storage**

Teng Wang,<sup>a,b</sup> Yifan Qin,<sup>a,b</sup> Renquan Hu,<sup>a,b</sup> Zehui Wei<sup>a,b</sup> and Yong Yang<sup>\*a,b</sup>

<sup>a</sup> State Key Laboratory of Solidification Processing, Center of Advanced Lubrication and Seal Materials, Northwestern Polytechnical University, Xi'an, Shaanxi 710072, P. R. China.

<sup>b</sup> Research & Development Institute of Northwestern Polytechnical University in Shenzhen, Shenzhen, Guangdong, 518057, P. R. China.

\*Corresponding author: [yongyangfj@nwpu.edu.cn](mailto:yongyangfj@nwpu.edu.cn)

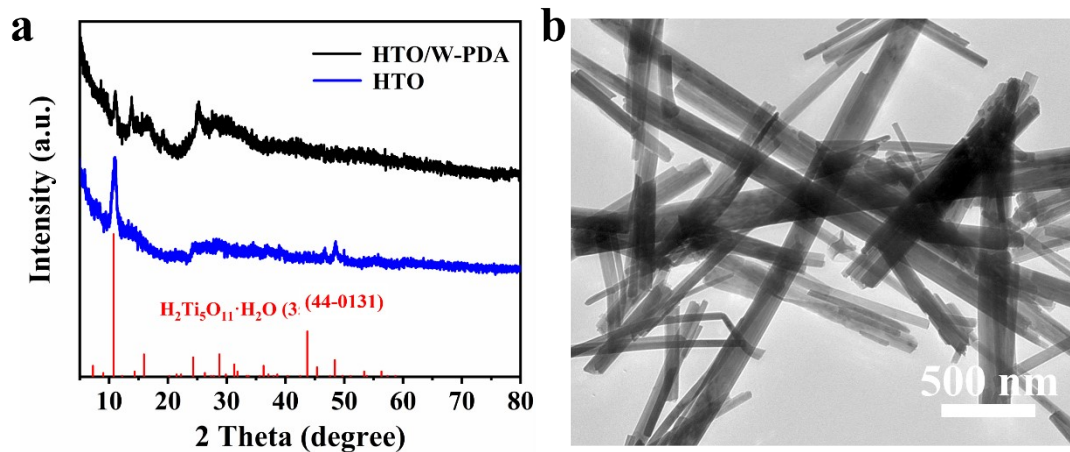

**Figure S1.** (a) XRD patterns of HTO nanowires and HTO/W-PDA precursor; (b) TEM image of HTO nanowires.

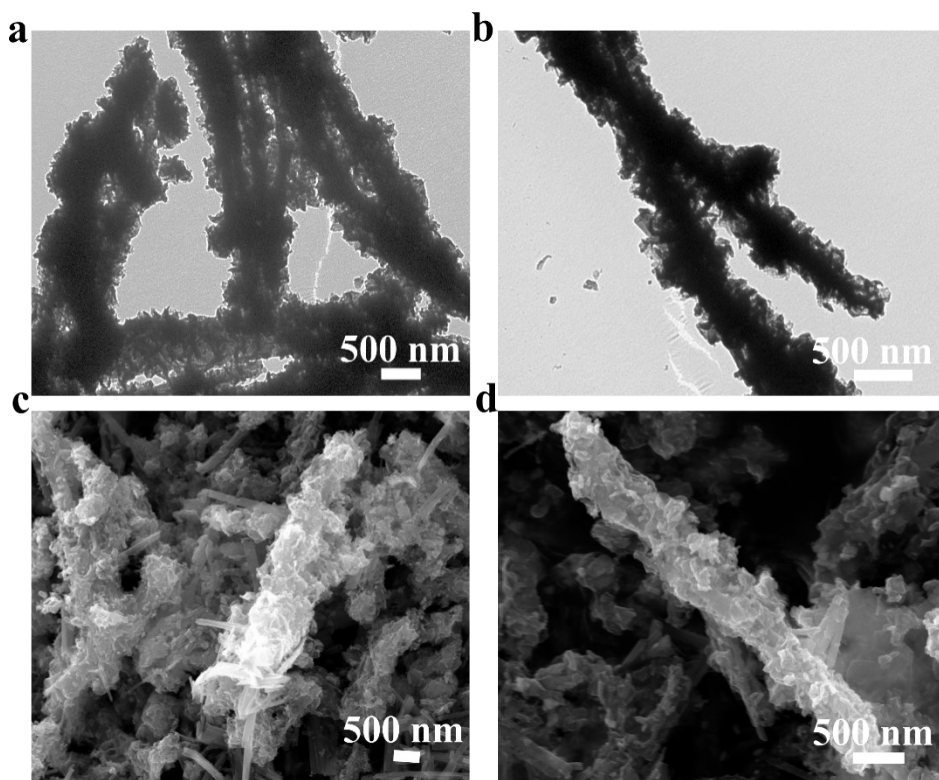

**Figure S2.** (a-b) TEM images and (c-d) SEM images of HTO/W-PDA precursor.

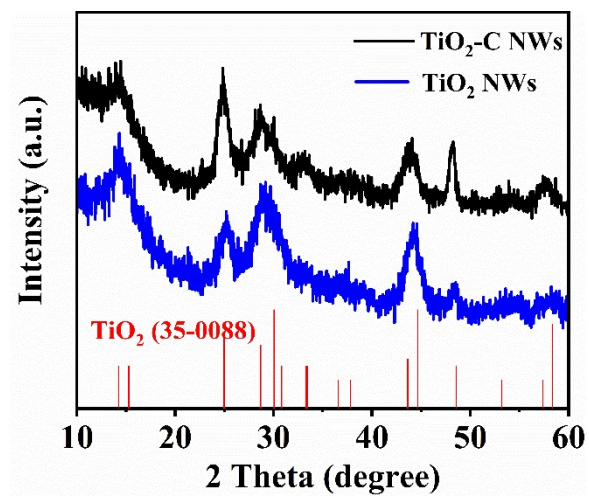

Figure S3. XRD patterns of TiO<sub>2</sub> nanowires and TiO<sub>2</sub>-C nanowires.



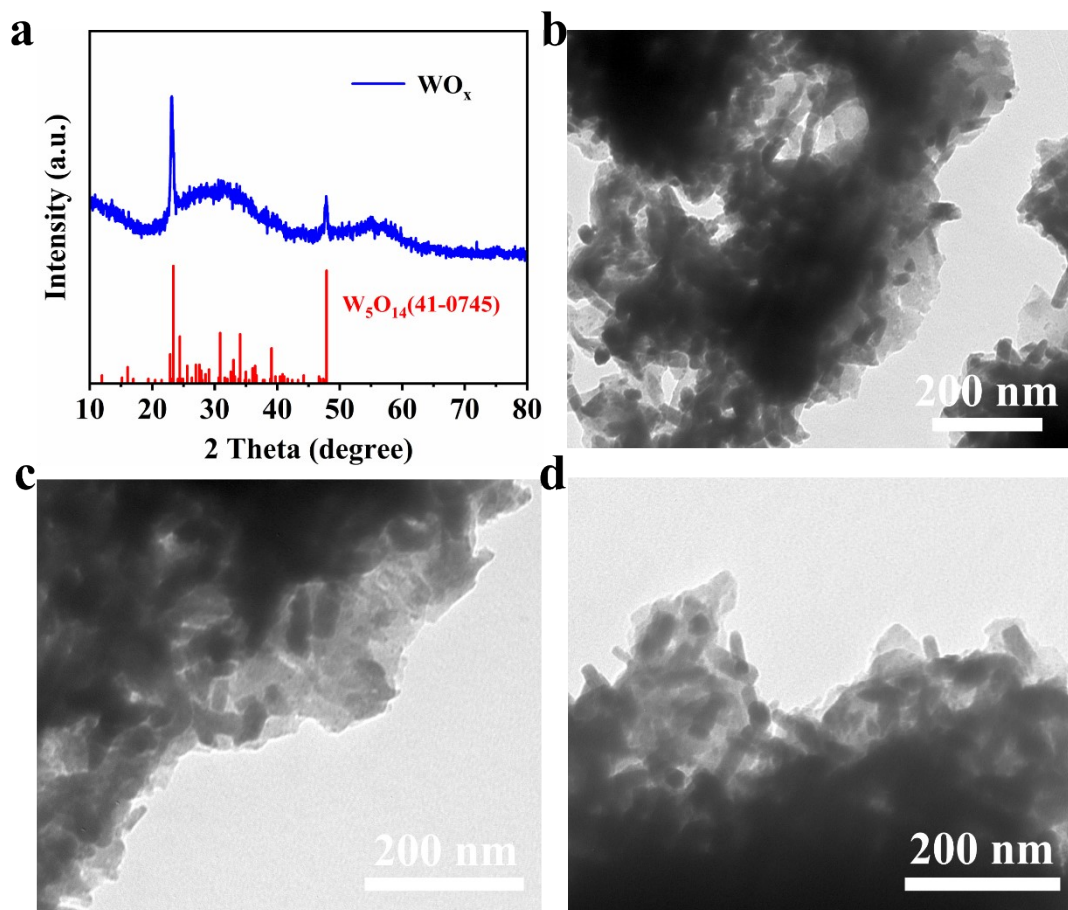

Figure S4. (a) XRD pattern and (b-d) TEM images of sample without HTO.

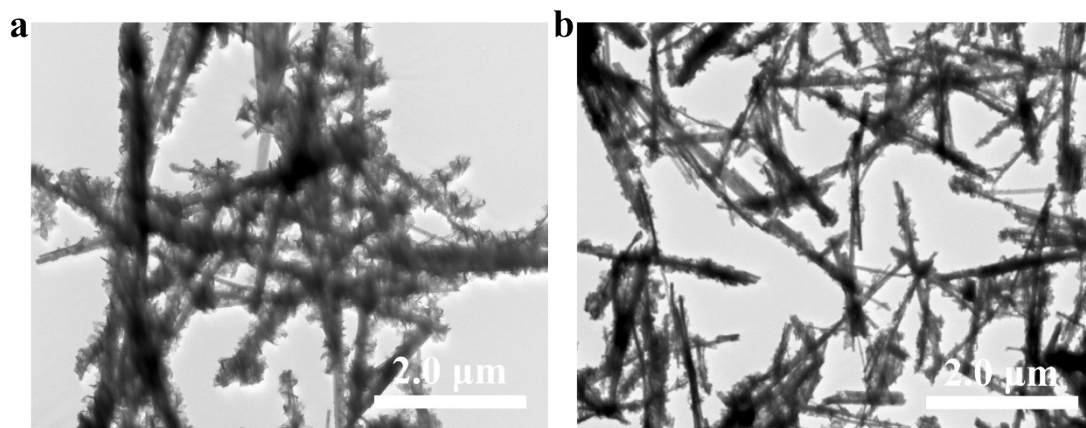

**Figure S5.** TEM images of tungsten-dopamine chelate precursor with (a) 20 mg HTO nanowires and (b) 30 mg HTO nanowires.

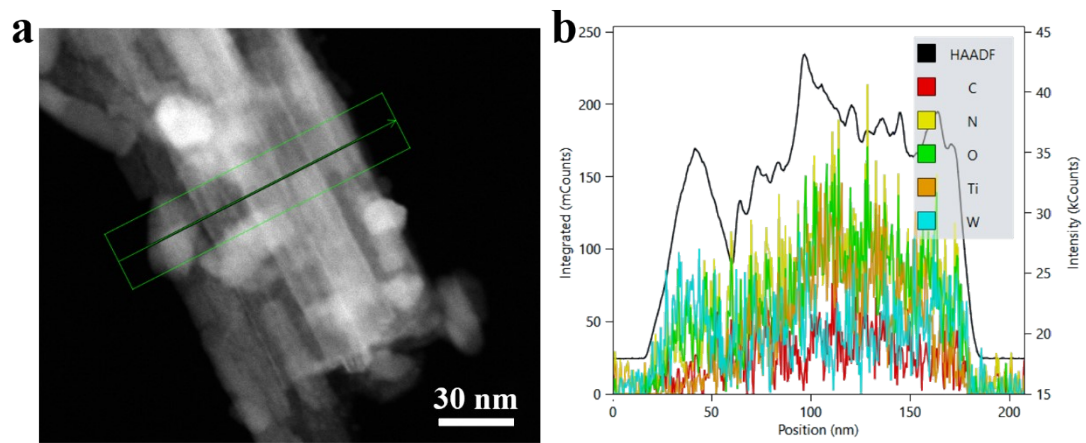

**Figure S6.** Linear scanning analysis of TiO<sub>2</sub>@WO<sub>x</sub>-C NWs.

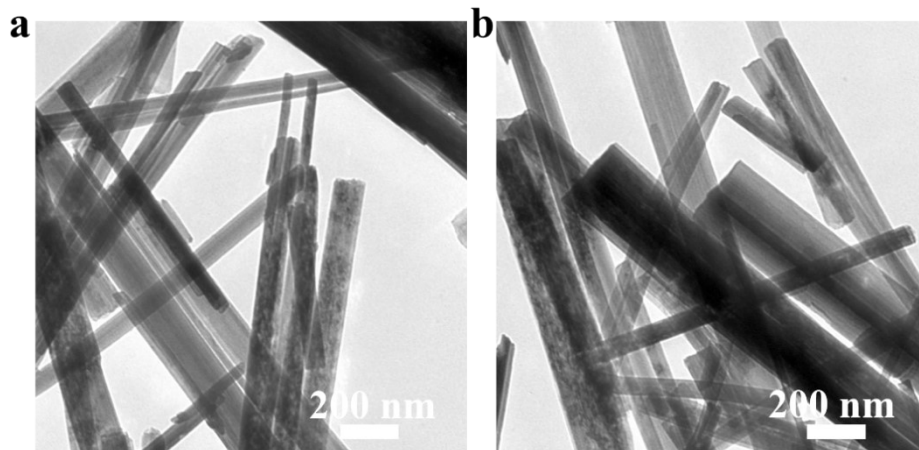

**Figure S7.** TEM images of TiO<sub>2</sub> nanowires.

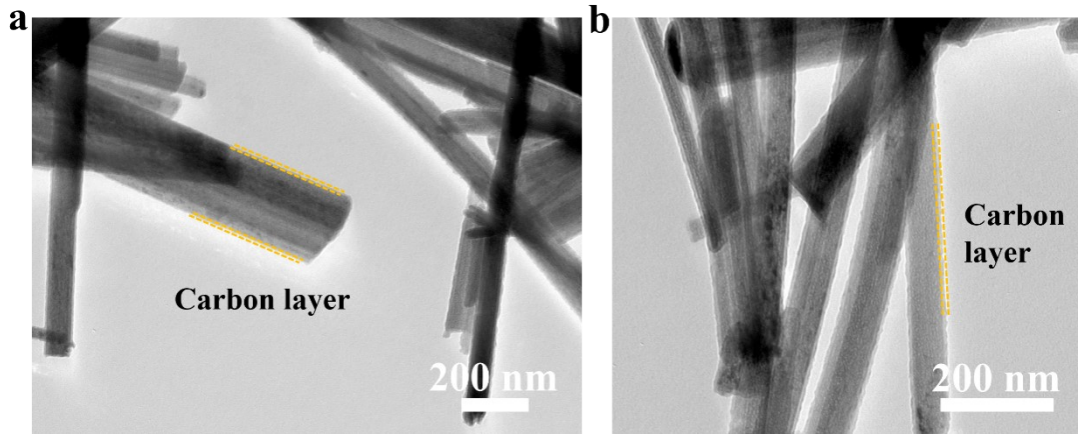

**Figure S8.** TEM images of TiO<sub>2</sub>-C nanowires.

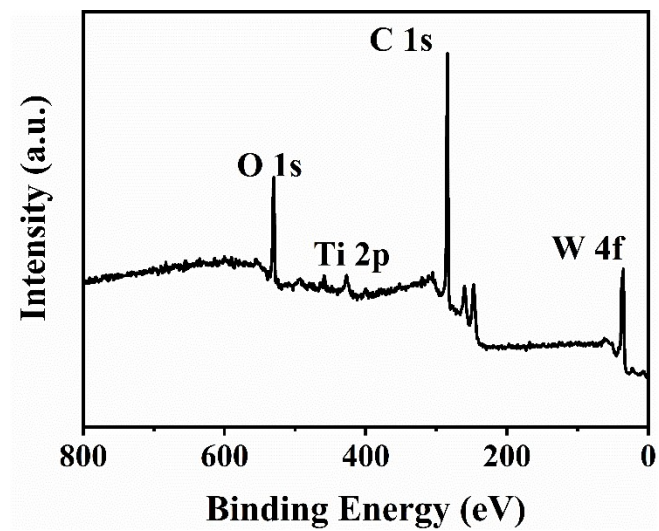

Figure S9. XPS spectra of TiO<sub>2</sub>/WO<sub>x</sub>-C NWs composites.

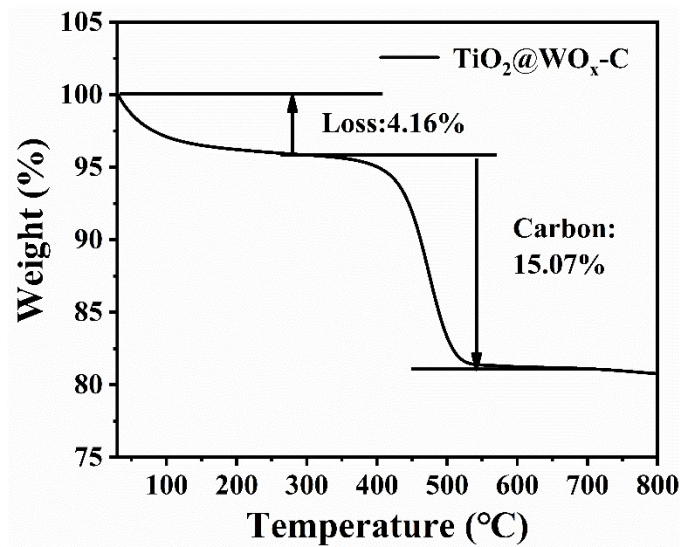

Figure S10. TGA curve of TiO<sub>2</sub>/WO<sub>x</sub>-C NWs composites.

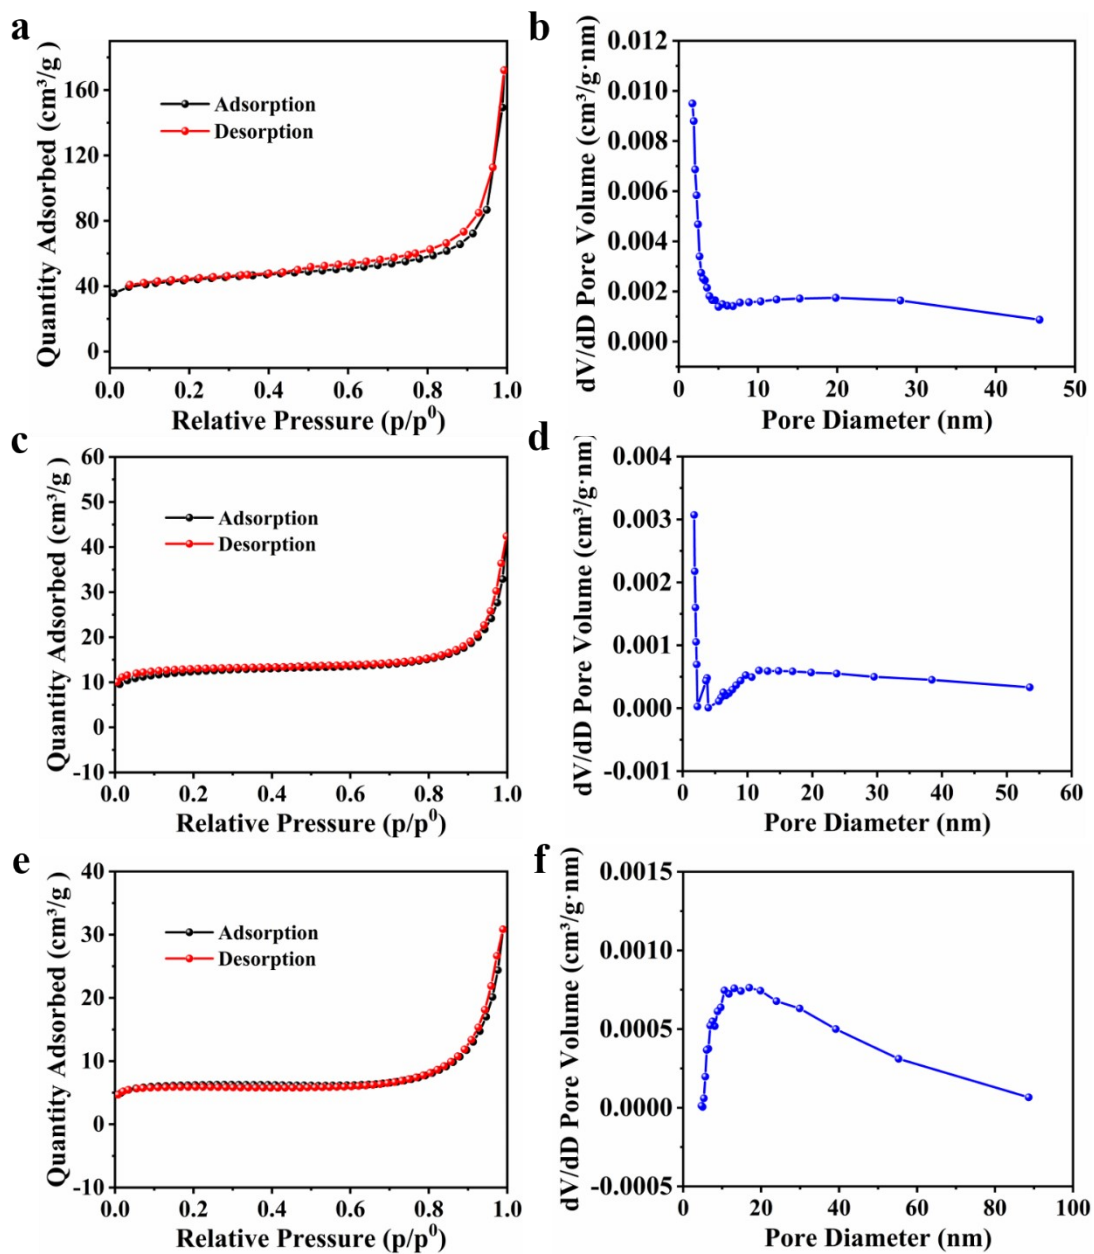

**Figure S11.** Nitrogen adsorption-desorption isotherms and the pore size distribution curves: (a-b) TiO<sub>2</sub>@WO<sub>x</sub>-C NWs; (c-d) TiO<sub>2</sub>-C nanowires; (e-f) TiO<sub>2</sub> nanowires.



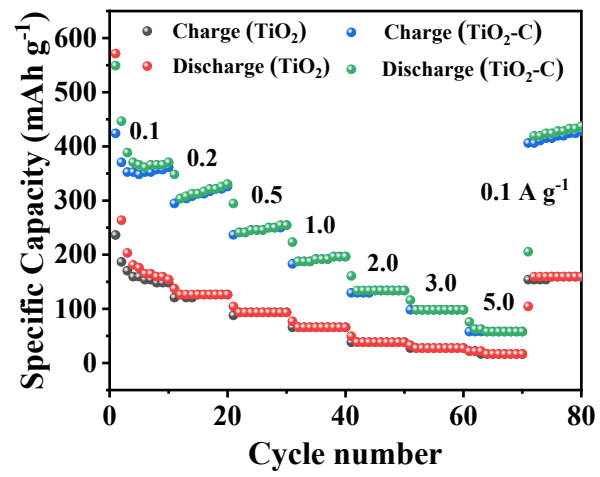

**Figure S12.** The rate performances of TiO<sub>2</sub>-C NWs and TiO<sub>2</sub> NWs

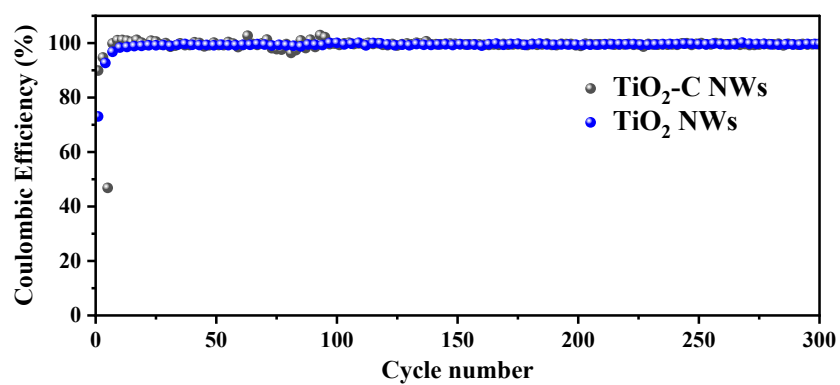

**Figure S13.** The coulombic efficiency of TiO<sub>2</sub>-C NWs and TiO<sub>2</sub> NWs.

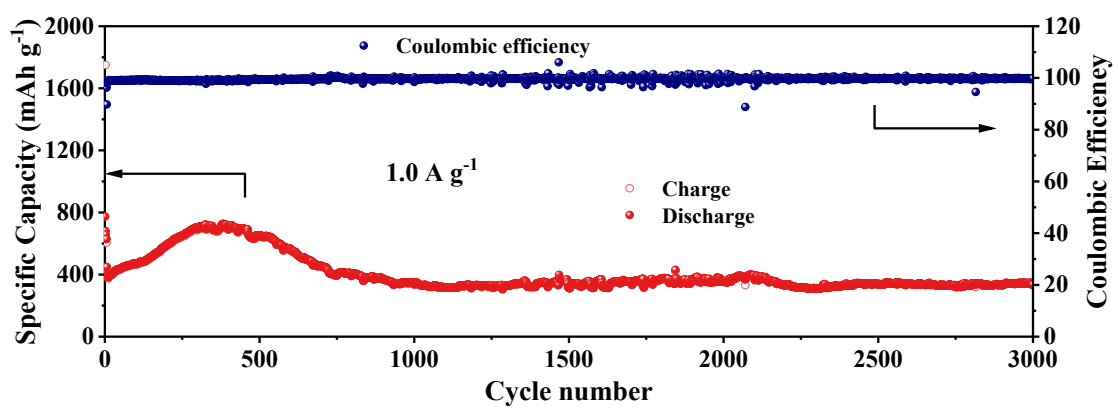

Figure S14. Long-term performance at  $1.0 \text{ A g}^{-1}$  after 3000 cycles.

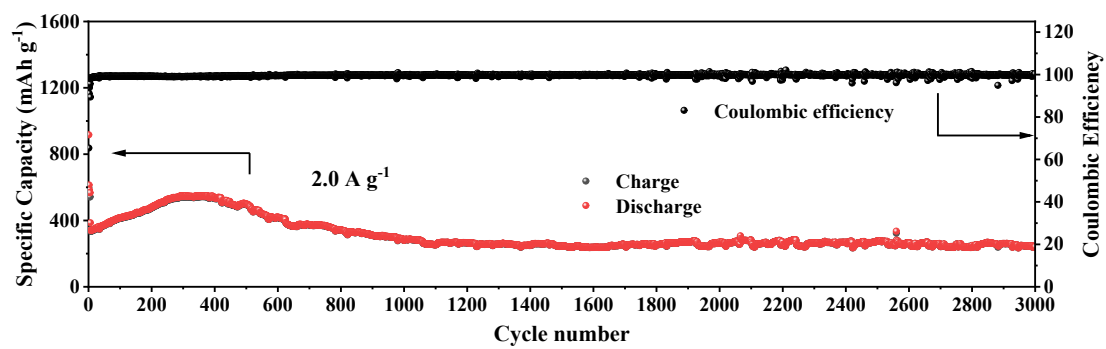

Figure S15. Long-term performance at  $2.0 \text{ A g}^{-1}$  after 3000 cycles.

**Table S1.** Comparison of the electrochemical performance of TiO<sub>2</sub>@WO<sub>x</sub>-C electrodes with related literature in lithium-ion batteries.

| Samples                                                | Current density (A g <sup>-1</sup> ) | Specific capacitance (mAh g <sup>-1</sup> ) | Cycle numbers | References                                                         |
|--------------------------------------------------------|--------------------------------------|---------------------------------------------|---------------|--------------------------------------------------------------------|
| SDD TiO <sub>2</sub>                                   | 1.0                                  | 254                                         | 1000          | <i>Nano Res.</i> 2021, <b>14</b> , 992-997                         |
| TiO <sub>2</sub> /rGO                                  | 1.0                                  | 245                                         | 1000          | <i>Small</i> , 2020, <b>16</b> , 2000030                           |
| TiO <sub>2</sub> @graphdiyne                           | 1.0                                  | 432.4                                       | 300           | <i>J. Mater. Chem. A</i> 2018, <b>6</b> , 22655-22661              |
| Macroporous titania                                    | 1.0                                  | 225                                         | 100           | <i>Chem. Mater.</i> 2020, <b>32</b> , 4716-4723                    |
| TiO <sub>2-x</sub> @C                                  | 0.1                                  | 432                                         | 100           | <i>ACS Appl. Mater. Interfaces</i> , 2019, <b>11</b> , 48039-48053 |
| TiO <sub>2</sub> /NC-MoS <sub>2</sub>                  | 0.1                                  | 629.9                                       | 200           | <i>Int. J. Electrochem. Sci.</i> , 2020, <b>15</b> , 8171-8180     |
| CMT-0.2                                                | 1.0                                  | 528.5                                       | 1000          | <i>Chem. Eng. J.</i> , 2021, <b>406</b> , 126873                   |
| Sb <sub>2</sub> S <sub>3</sub> /Sb@TiO <sub>2</sub> @C | 0.5                                  | 495.8                                       | 500           | <i>ACS Appl. Mater. Interfaces</i> , 2022, <b>14</b> , 33064-33075 |
| <b>TiO<sub>2</sub>@WO<sub>x</sub>-C</b>                | <b>1.0</b>                           | <b>651.4</b>                                | <b>500</b>    | <b>This work</b>                                                   |
